# Supplementary material for: Ultrahigh capacity and superior stability of three-dimensional porous graphene networks containing in situ grown carbon nanotube clusters as an anode material for lithium-ion batteries
Source: Royal Society of Chemistry journal article supplement (doi:10.1039/c6ta11191b), 2017-01-01
Supplement: c6ta11191b1.pdf [file c6ta11191b1.pdf]

## Supporting Information

### **Ultrahigh Capacity and Superior Stability of Three-Dimensional Porous Graphene Networks Containing In Situ Grown Carbon Nanotube Clusters as Anode Material for Lithium-Ion Batteries**

Shizhi Huang, Jingyan Wan, Zhiyi Pan, Jinliang Zhu\* and Pei Kang Shen\*

*Guangxi Key Laboratory of Electrochemical Energy Materials, Collaborative Innovation Center of Renewable Energy Materials, and State Key Laboratory of Processing for Non-ferrous Metal and Featured Materials, Guangxi University, Nanning, 530004, PR China*

\* Corresponding author. Tel.: +86 07713237990; E-mail: jlzhu85@163.com (Jinliang Zhu); pkshen@gxu.edu.cn (Pei Kang Shen).

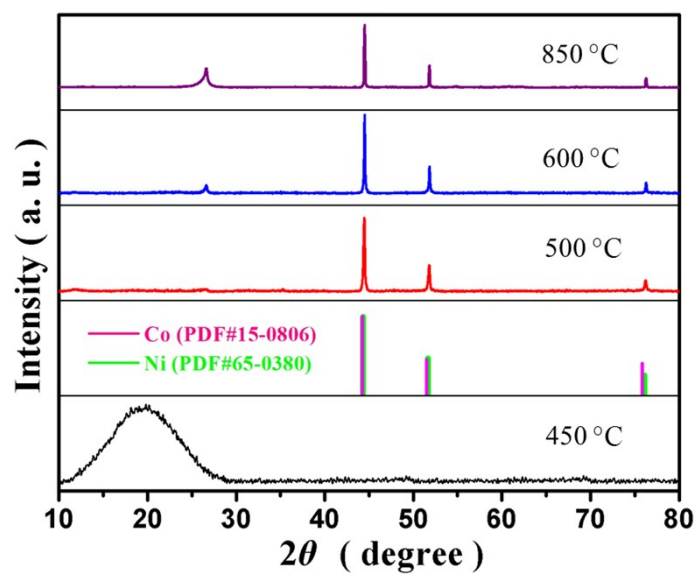

**Fig. S1** XRD patterns of CNTs@3DG fabrications at different temperatures.

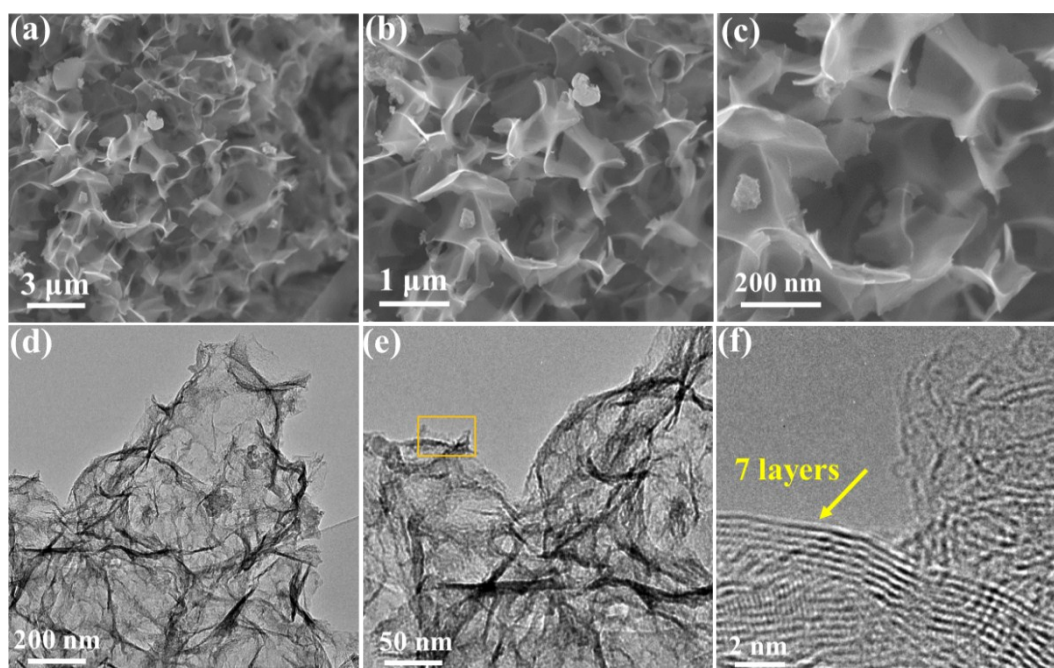

**Fig. S2** (a-c) SEM and (d-f) TEM images of 3DG, marked region in e is corresponding to f.

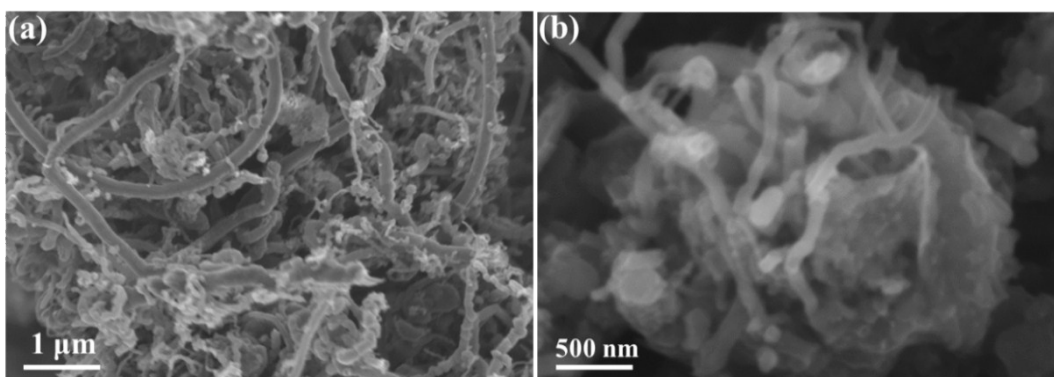

**Fig. S3** SEM images of (a) CCNTs and (b) 3DG+CCNTs.

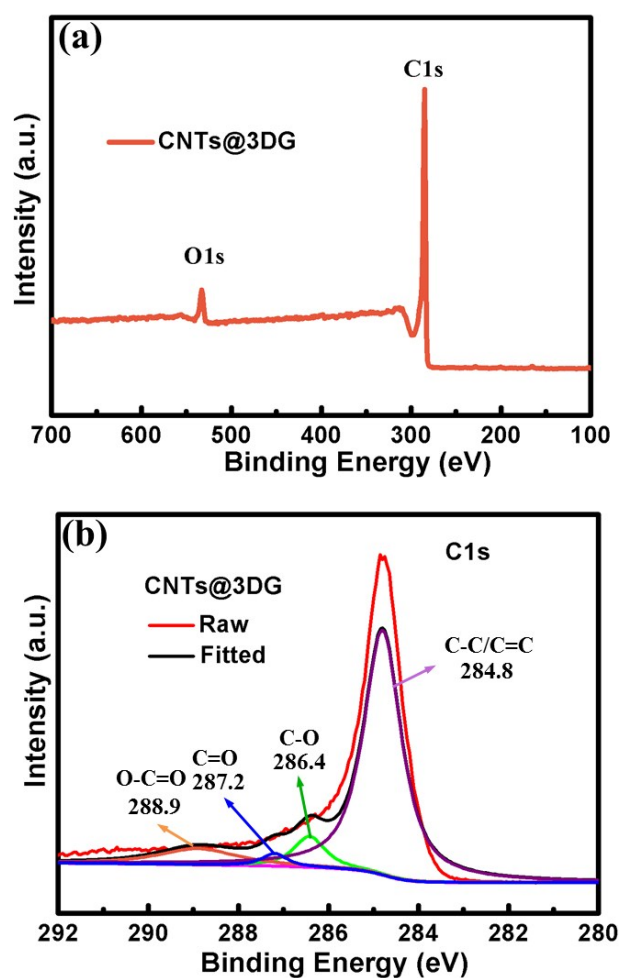

**Fig. S4** XPS spectra of (a) CNTs@3DG and (b) C1s.

In this XPS analysis, the atomic percentages of C1s and O1s are 92.57 and 6.34%, respectively.

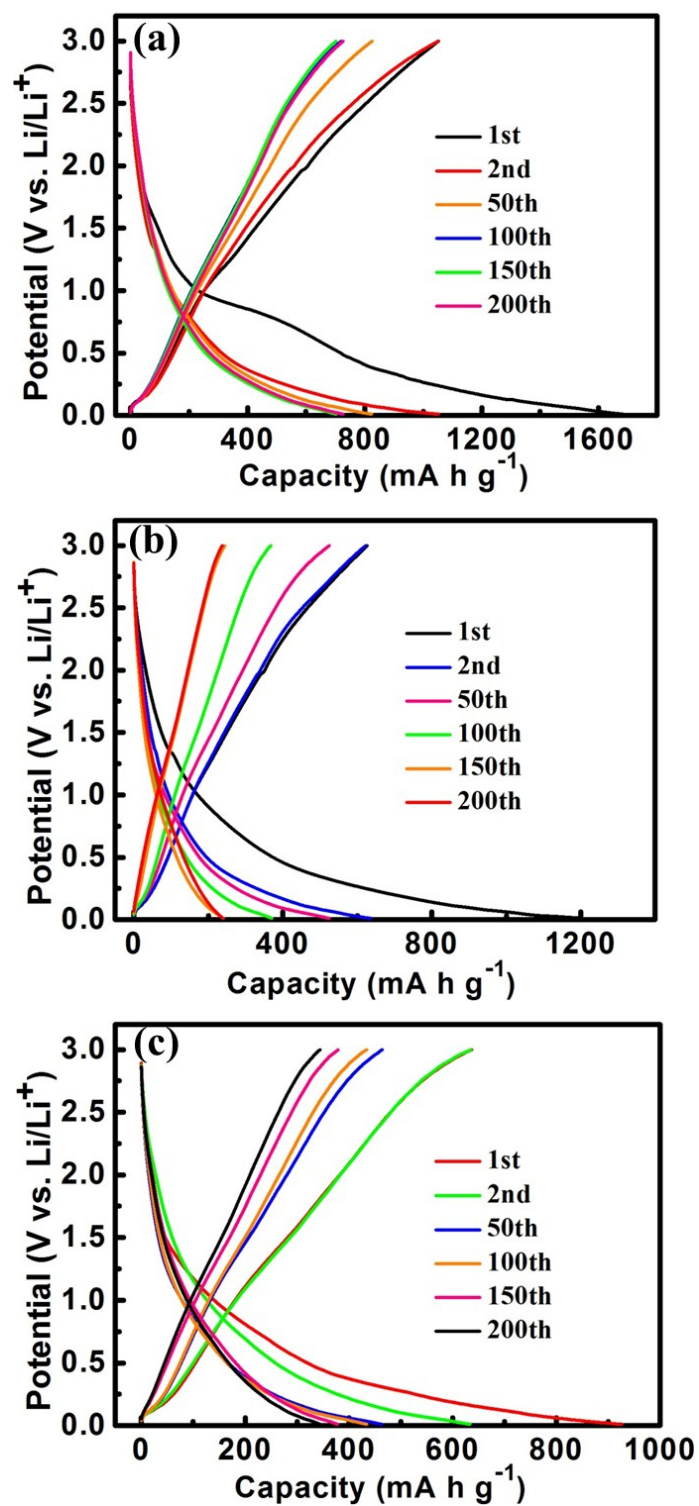

**Fig. S5** Voltage profiles of (a) 3DG, (b) 3DG+CCNTs, and (c) CCNTs at a current rate of  $0.1 \text{ A g}^{-1}$  with the voltage range from  $0.01 \text{ V}$  to  $3 \text{ V}$  (vs.  $\text{Li/Li}^+$ ).

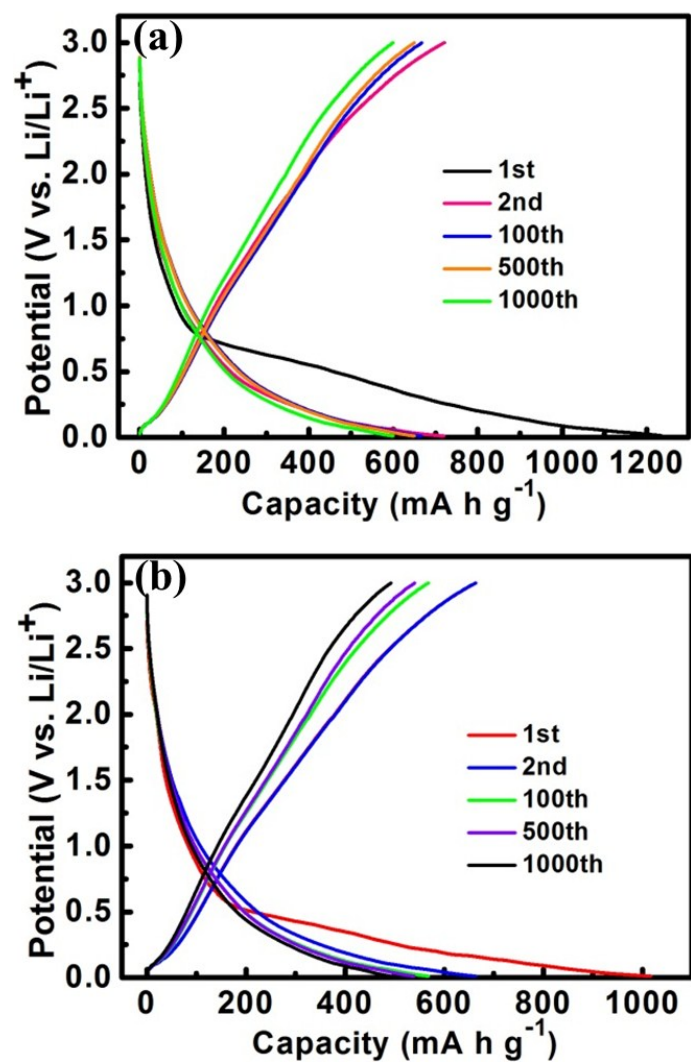

**Fig. S6** Voltage profiles of CNTs@3DG at current rates of (a) 1 A g<sup>-1</sup>, (b) 2 A g<sup>-1</sup> with the voltage range from 0.01 V to 3 V (vs. Li/Li<sup>+</sup>).

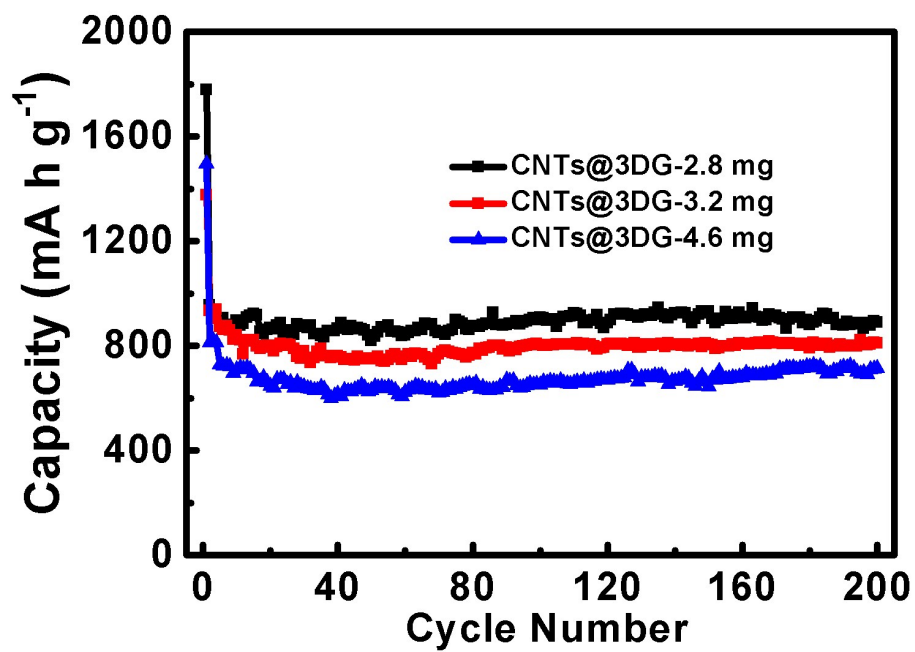

**Fig. S7** Cyclic properties of highly CNTs@3DG anode masses of 2.8, 3.2 and 4.6 mg from 0.01 V to 3 V (vs. Li/Li<sup>+</sup>) at a current of 100 mA g<sup>-1</sup>.

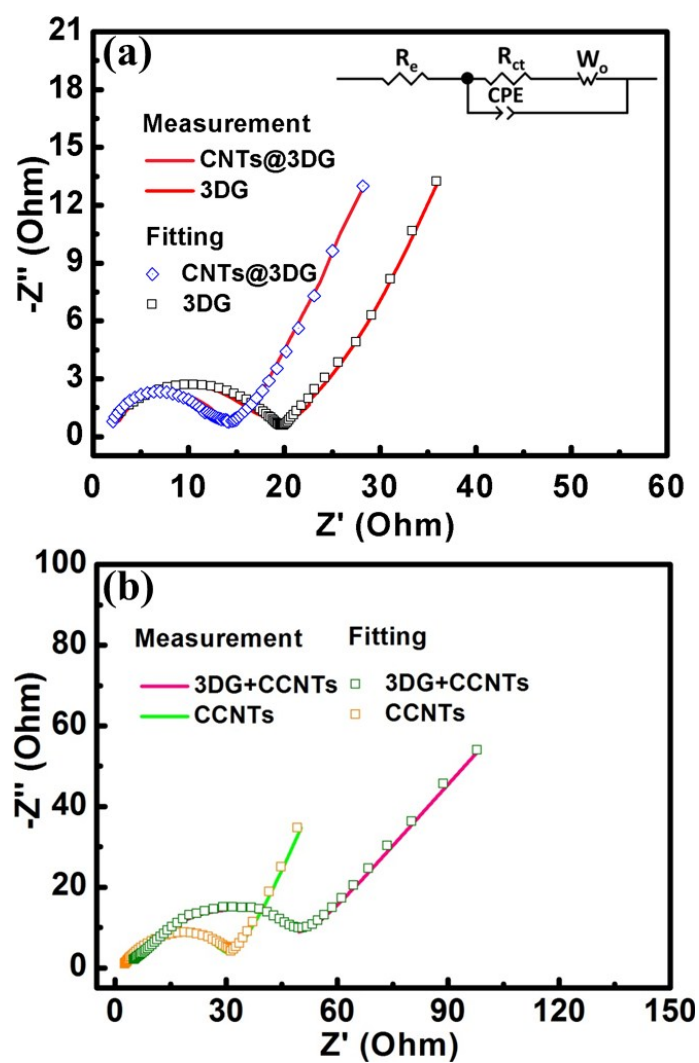

**Fig. S8** Electrochemical impedance spectroscopies (EIS) of CNTs@3DG, 3DG, 3DG+CCNTs and CCNTs after 200 cycles. The insertion in (a) is corresponding to the equivalent circuit.



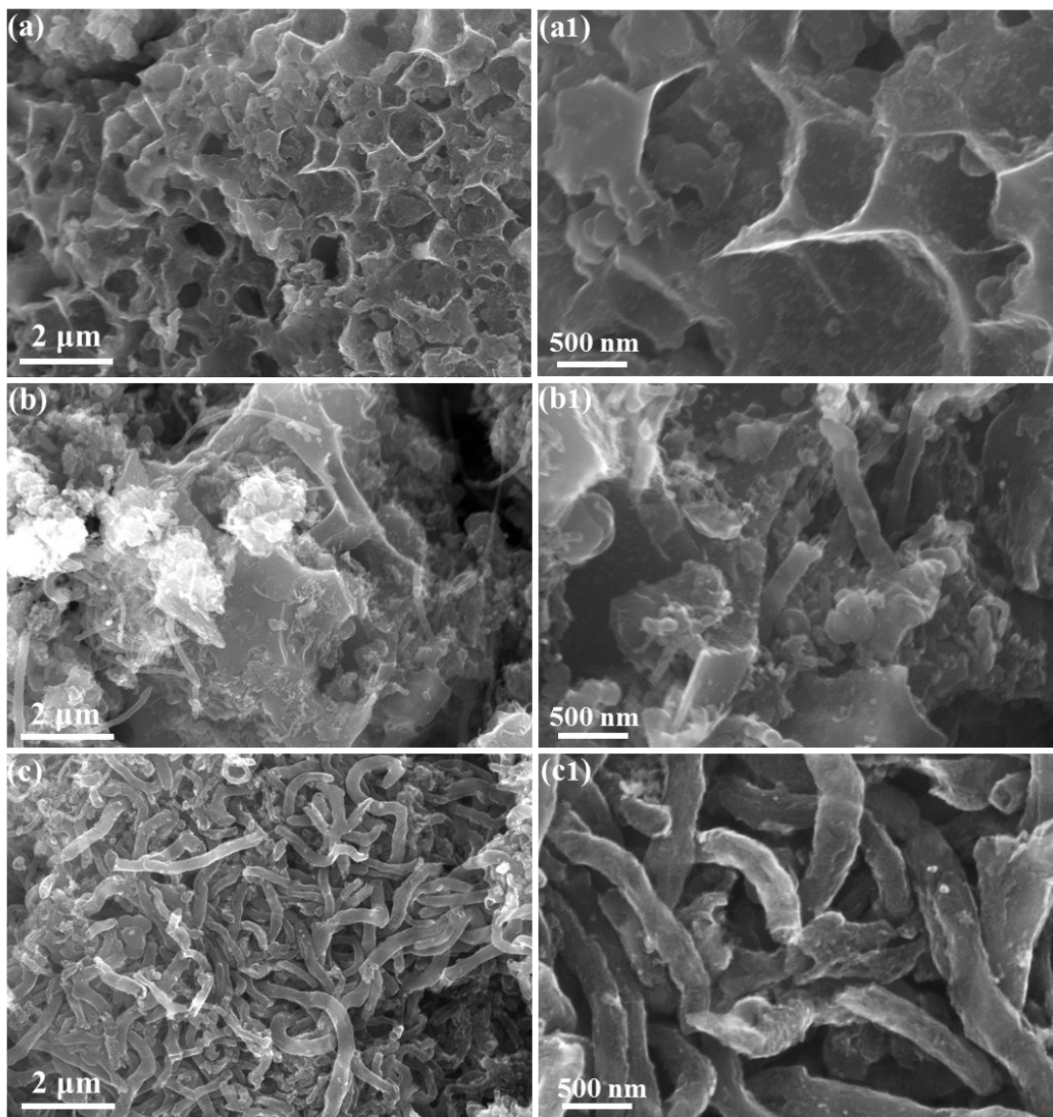

**Fig. S9** SEM images of (a, a1) 3DG, (b, b1) 3DG+CCNTs, and (c, c1) CCNTs after discharge/charge 200 cycles.



**Table S1.** Performance comparisons of CNTs@3DG and other typical carbon-based anode materials for lithium ions batteries.

| Materials                                          | Current Densities (mA g <sup>-1</sup> ) | Reversible Capacity (mA h g <sup>-1</sup> ) | Decay rate of per cycle | Ref.      |
|----------------------------------------------------|-----------------------------------------|---------------------------------------------|-------------------------|-----------|
| Nanoporous carbon nanotube                         | 50                                      | 375                                         | 0.2%                    | [1]       |
| Graphene-multiwalled carbon nanotubes hybrid       | 90                                      | 813                                         | 0.41%                   | [2]       |
| Graphene oxide/graphite/carbon nanotube composites | 100                                     | 1172.5                                      | 0.17%                   | [3]       |
| Graphene-winged carbon nanotubes                   | 100                                     | 644                                         | 0.28%                   | [4]       |
| N-doped Graphene Sheets                            | 50                                      | 1043                                        | 0.54%                   | [5]       |
| Nitrogen and fluorine co-doped graphene            | 100                                     | 1073                                        | 0.57%                   | [6]       |
| Graphite/Graphene Nanosheets                       | 744                                     | 500                                         | 0.025%                  | [7]       |
| Graphene/N-doped carbon                            | 100                                     | 1100                                        | 0.19%                   | [8]       |
| Hierarchical carbon nanocages                      | 100                                     | 1021                                        | 0.50%                   | [9]       |
| Biomass derived carbon nanoparticle                | 100                                     | 742                                         | 1.11%                   | [10]      |
| CNTs@3DG                                           | 100                                     | 1132                                        | 0.03%                   | This work |
|                                                    | 1000                                    | 720                                         | 0.017%                  |           |
|                                                    | 2000                                    | 663                                         | 0.025%                  |           |

## References

- 1 X. Li, J. Yang, Y. Hu, J. Wang, Y. Li, M. Cai, R. Li and X. Sun, *J. Mater. Chem.*, 2012, **22**, 18847–18853.
- 2 B. P. Vinayan, R. Nagar, V. Raman, N. Rajalakshmi, K. S. Dhathathreyan and S. Ramaprabhu, *J. Mater. Chem.*, 2012, **22**, 9949–9956.
- 3 B. Li, N. Zhang and K. Sun, *Small*, 2014, **10**, 2039–2046.
- 4 M. Ye, C. Hu, L. Lv and L. Qu, *J. Power Sources*, 2016, **305**, 106–114.
- 5 Z. -S. Wu, W. Ren, L. Xu, F. Li, and H. -M. Cheng, *ACS Nano*, 2011, **5**, 5463–5471.
- 6 S. Huang, Y. Li, Y. Feng, H. An, P. Long, C. Qin and W. Feng, *J. Mater. Chem. A*, 2015, **3**, 23095–23105.
- 7 M. Agostini, S. Brutti and J. Hassoun, *ACS Appl. Mater. Interfaces*, 2016, **8**, 10850–10857.
- 8 X. Liu, J. Zhang, S. Guo and N. Pinna, *J. Mater. Chem. A*, 2016, **4**, 1423–1431.
- 9 Z. Lyu, L. Yang, D. Xu, J. Zhao, H. Lai, Y. Jiang, Q. Wu, Y. Li, X. Wang and Z. Hu, *Nano Res.*, 2015, **8**, 3535–3543.
- 10 R. R. Gaddam, D. Yang, R. Narayan, K. Raju, N. A. Kumar and X. S. Zhao, *Nano Energy*, 2016, **26**, 346–352.
